# Supplementary material for: Plasma-jet printing of colloidal thermoelectric Bi2Te3 nanoflakes for flexible energy harvesting
Source: Royal Society of Chemistry journal article supplement (doi:10.1039/d2nr06454e), 2023-01-01
Supplement: d2nr06454e1.pdf [file d2nr06454e1.pdf]

Jacob Manzi is a Ph.D. student in the School of Electrical Engineering and Computer Science at Oregon State University. He received his B.S. in Physics at Northwest Nazarene University. His research interests include additive manufacturing for flexible hybrid electronic applications, 2D materials, and printed device characterization. More specifically, his research focuses on plasma-jet printing of electronic materials for in-space manufacturing.

**Harish Subbaraman** earned the M.S. and Ph.D. degrees in electrical engineering from The University of Texas at Austin in 2006 and 2009, respectively. Until 2016, he worked as a Senior Research Scientist at Omega Optics, Inc (Austin, TX), where he led and managed several SBIR/STTR projects in the areas of printed and flexible hybrid electronics and silicon/polymer photonics. In 2016, he joined The Department of Electrical and Computer Engineering at Boise State University (Boise, ID). At Boise State, he served as the Associate Site Director for NSF I/UCRC (ATOMIC) and the Advanced Manufacturing BSU lead for the Center for Advanced Energy Studies. He joined The School of Electrical Engineering and Computer Science at Oregon State University in Fall 2022, where he is currently an Associate Professor. He has published in over 200 refereed journals and conferences. He is a senior member of IEEE.
